# Supplementary material for: Hexacoordinate germanate metal–organic frameworks for the detection of Pb2+ ions in aqueous solution
Source: Royal Society of Chemistry journal article supplement (doi:10.1039/d4tc01700e), 2024-01-01
Supplement: d4tc01700e1.pdf [file d4tc01700e1.pdf]

# Supplementary Information

## Hexacoordinate Germanate Metal-Organic Frameworks for the Detection of Pb<sup>2+</sup> ions in Aqueous Solution

Shouyi Tian,<sup>a</sup> Peter N. Horton,<sup>b</sup> Simon J. Coles,<sup>b</sup> Andrew J. P. White,<sup>a</sup> Paul D. Lickiss,<sup>a</sup> Robert P. Davies\*<sup>a</sup>

<sup>a</sup> Molecular Sciences Research Hub, Department of Chemistry, Imperial College London, London, W12 0BZ, UK.

<sup>b</sup> EPSRC Crystallographic Service, Department of Chemistry, University of Southampton, Highfield, Southampton, SO17 1BJ, UK

\*Corresponding author email: [r.davies@imperial.ac.uk](mailto:r.davies@imperial.ac.uk)

## Materials and general methods

All chemicals are commercially available, unless specified, were used without further purification. Anhydrous solvent was obtained under a nitrogen atmosphere from a Puresolv multiple dispensing solvent drying system. All “water” or “H<sub>2</sub>O” refer to deionized water. Linker synthesis reactions were performed under N<sub>2</sub> using standard Schlenk line techniques, and all glasswares were dried in a 120 °C oven overnight before use. NMR spectra were recorded on a Bruker 400 MHz spectrometer and all chemical shifts are reported in  $\delta$ . Infrared (IR) spectra were recorded on an Agilent Cary 630 FTIR Spectrometer. Powder X-ray diffraction (PXRD) results were collected on a Bruker 2D Phaser machine with Cu-K $\alpha$  radiation (1.51184 Å) between 5° and 50° (2 $\theta$ ). Single crystal X-ray diffraction (SCXRD) results were collected on an Oxford Diffraction Xcalibur 3 diffractometer ([Et<sub>3</sub>NH]<sub>2</sub>[H<sub>3</sub>L-Si]), a Rigaku FR-E+ diffractometer (**IMP-33-Sc**) and a Rigaku 007HF diffractometer (**IMP-34-Y** and **IMP-34-Dy**). Thermogravimetric analysis (TGA) was carried out on a Perkin Elmer TGA 8000 instrument under a N<sub>2</sub> flow (50 mL/min) over the range of 30-600 °C at a heating rate of 10 °C/min. Photoluminescence (PL) spectrum was recorded on a Cary Eclipse Fluorescence Spectrophotometer and the slit width of both the source and detector for the excitation and the emission were kept at 5 nm to maintain consistency. PL quantum yield was measured using Edinburgh Instruments FLS1000 spectrometer with an integrating sphere. UV-vis spectrum was recorded on a Cary 5000 UV-Vis-NIR Spectrophotometer.

## Crystal growth

Single crystals of [Et<sub>3</sub>NH]<sub>2</sub>[H<sub>3</sub>L-Si] were obtained through vapour diffusion method.<sup>1</sup> 16 mg compound was dissolved in 0.5 mL hot DMF and placed in a 3.5 mL glass vial, and this vial was placed in a 14 mL glass vial containing 2.5 mL diethyl ether. Colourless tablet crystals were obtained in the small vial after 3 days.

## MOF synthesis

**IMP-RE** series MOFs were synthesized through hydrothermal method. A mixture of metal nitrate (Sc, Y, Gd, Tb, Dy, Ho, Er, Tm, Yb or Lu, all trivalent, 0.1 mmol) and [Et<sub>3</sub>NH]<sub>2</sub>[H<sub>3</sub>L-Ge] (0.05 mmol) were placed in a 7 mL glass vial followed by adding water (3 mL) and MeCN (1 mL). The glass vial was then sonicated for 5 mins to ensure the reagent completely dissolved, before heating at 80 °C for 24 h to afford blade-shaped crystals (**IMP-33-Sc** was in prism shape). **IMP-34-Ho** and **IMP-34-Er** exhibited light orange and pink colours respectively, while other crystals were colourless.

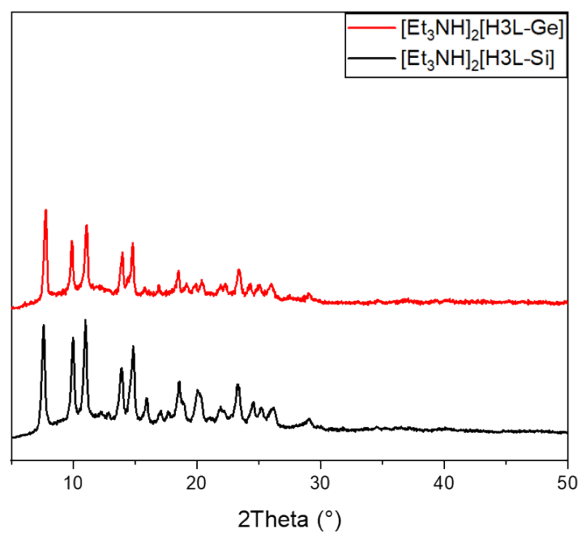

Figure S1 PXR D results of the measured Si and Ge linker.

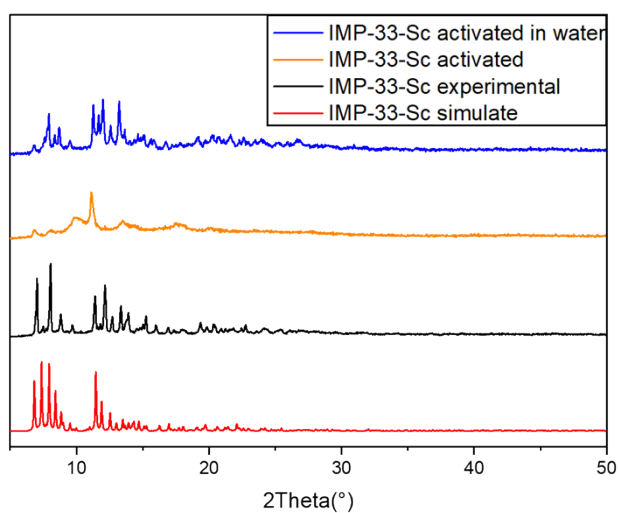

Figure S2 PXR D pattern of **IMP-33-Sc** (calculated, measured, activated, activated then soaked in water).

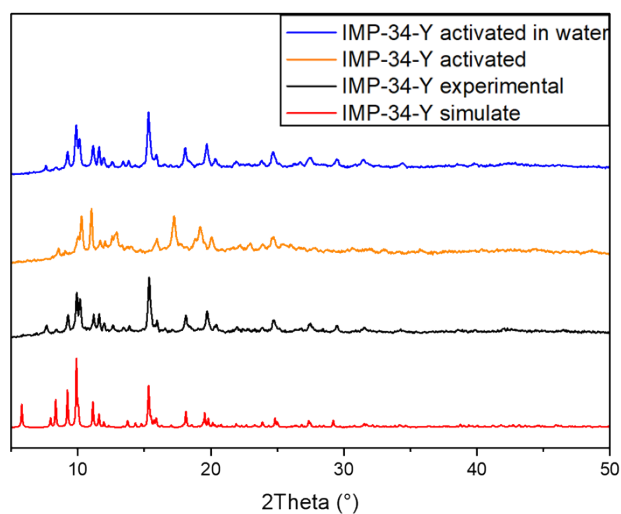

Figure S3 PXR D pattern of **IMP-34-Y** (calculated, measured, activated, activated then soaked in water).

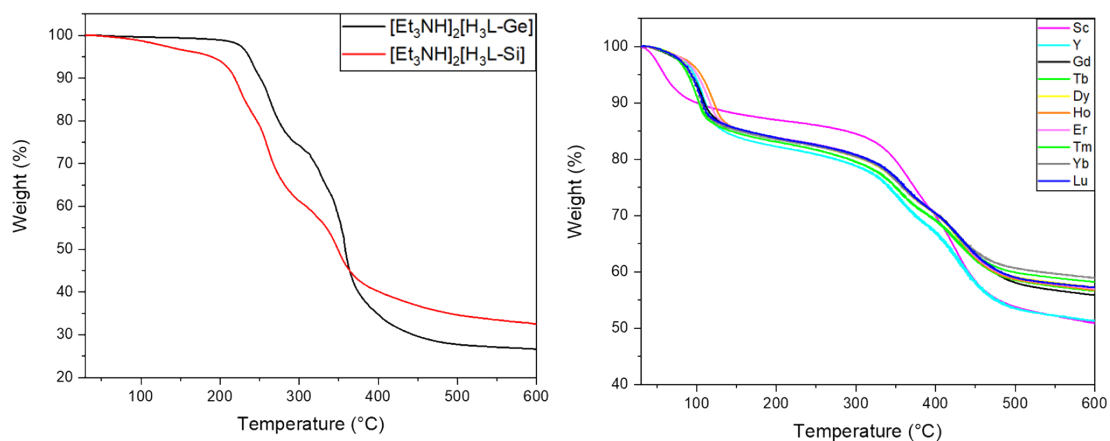

Figure S4 TGA results of the ligands and **IMP-RE** (all MOFs)

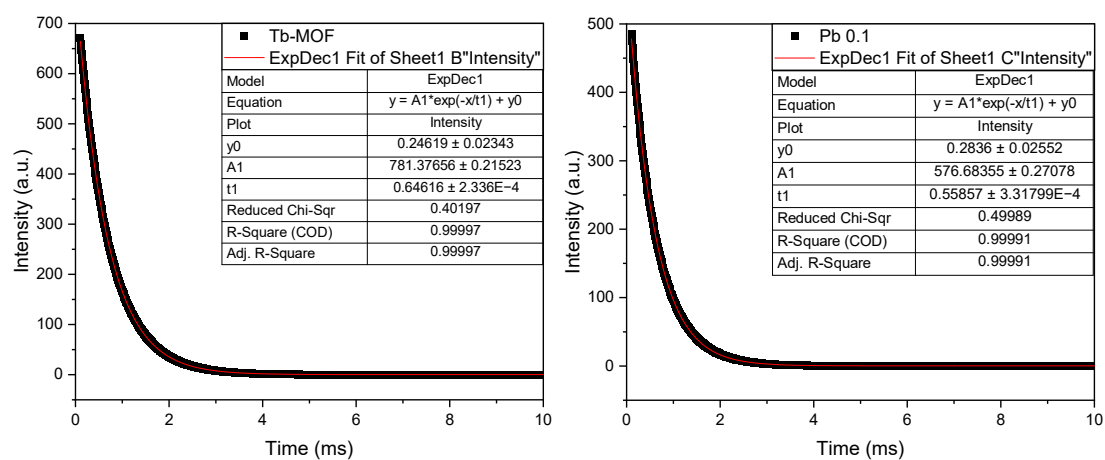

Figure S5 Lifetime of the peak at 545 nm of **IMP-34-Tb**, and Pb treated **IMP-34-Tb**

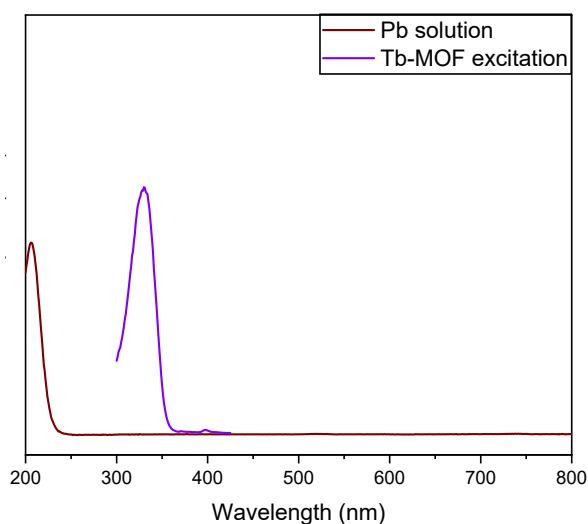

Figure S6 UV-vis absorption spectra of  $Pb^{2+}$  solution (brown) and excitation spectra of **IMP-34-Tb** (purple).

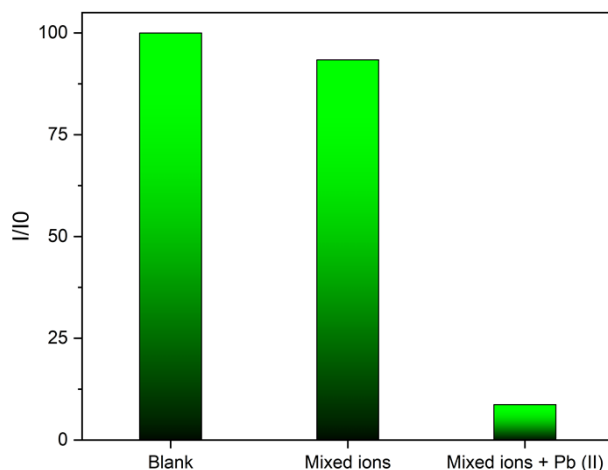

Figure S7 Comparison of the luminescence intensity of **IMP-34-Tb** in the presence of a solution of mixed ions: (10 mM Na<sup>+</sup>, Mg<sup>2+</sup>, K<sup>+</sup>, Ca<sup>2+</sup>, Mn<sup>2+</sup>, Co<sup>2+</sup>, Ni<sup>2+</sup>, Zn<sup>2+</sup>, Cd<sup>2+</sup>, Sr<sup>2+</sup> and Cs<sup>+</sup>)

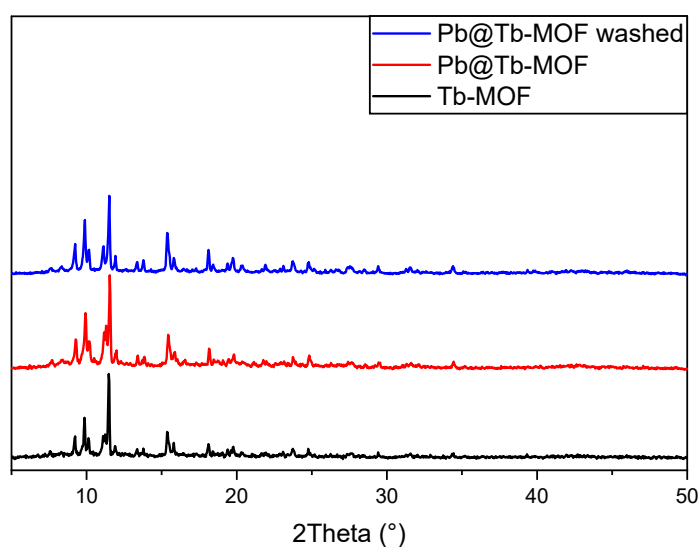

Figure S8 PXRD pattern of the **IMP-34-Tb** (Tb-MOF), Pb-treated Tb-MOF (Pb@Tb-MOF), and washed Pb-treated Tb-MOF.

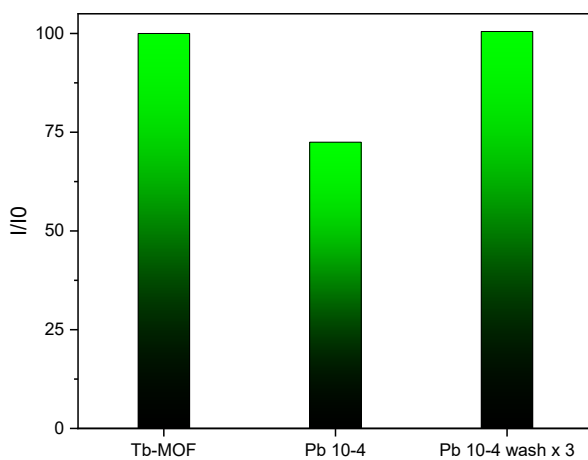

Figure S9 Relative luminescence intensity of the **IMP-34-Tb**, Pb-treated Tb-MOF and washed Pb-treated Tb-MOF.

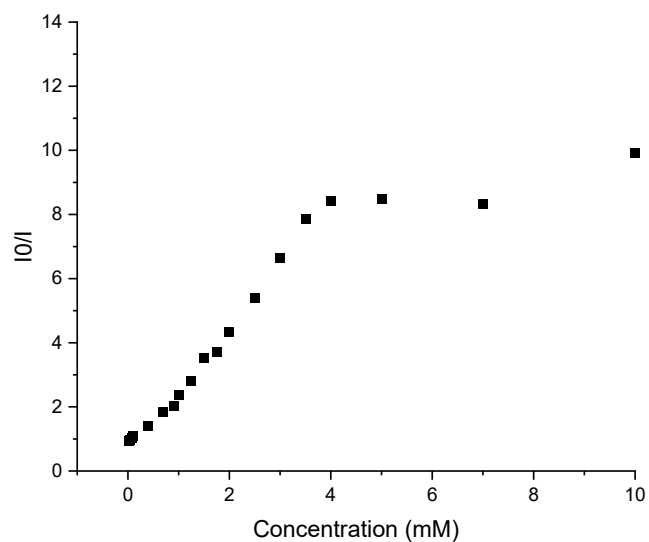

Figure S10 Stern-Volmer plot of relative intensity and  $\text{Pb}^{2+}$  in full concentration region.

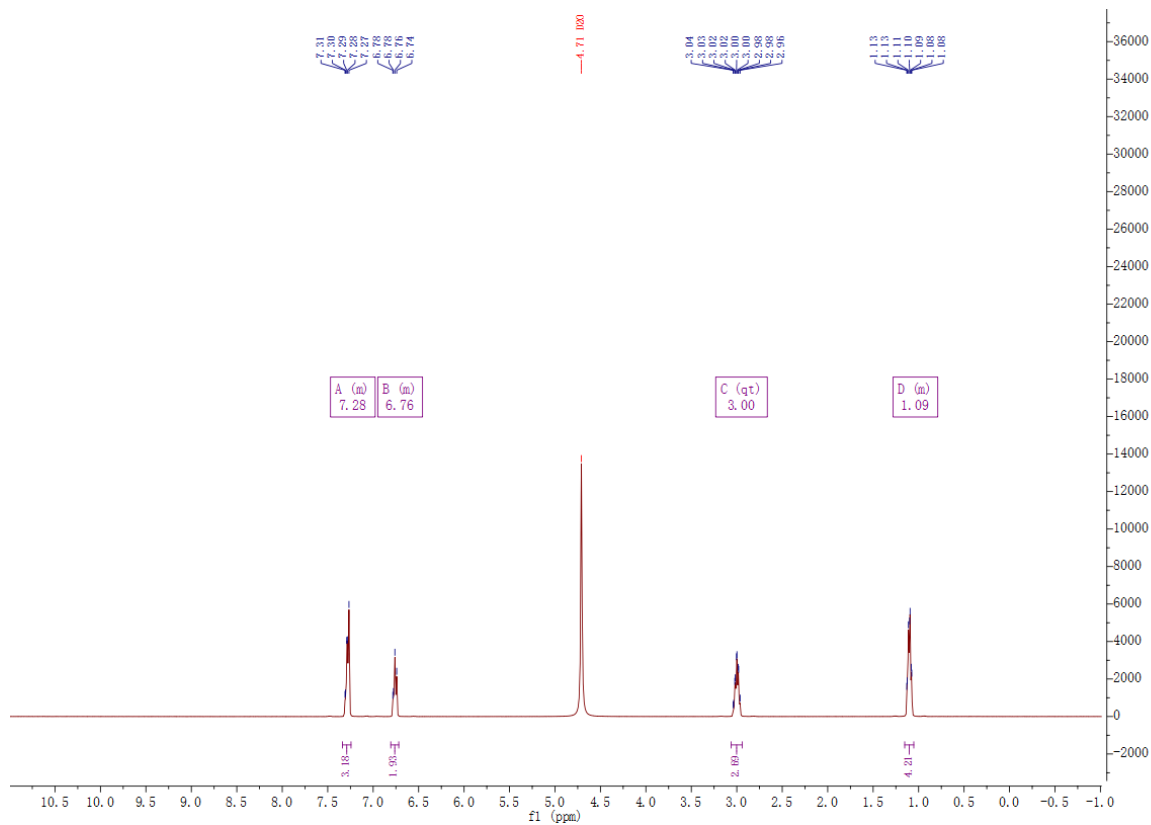

Figure S11  $^1\text{H}$  NMR of 3,4-dihydroxybenzoic acid and  $[\text{Et}_3\text{NH}]_2[\text{H}_3\text{L-Si}]$  in  $\text{D}_2\text{O}$ .

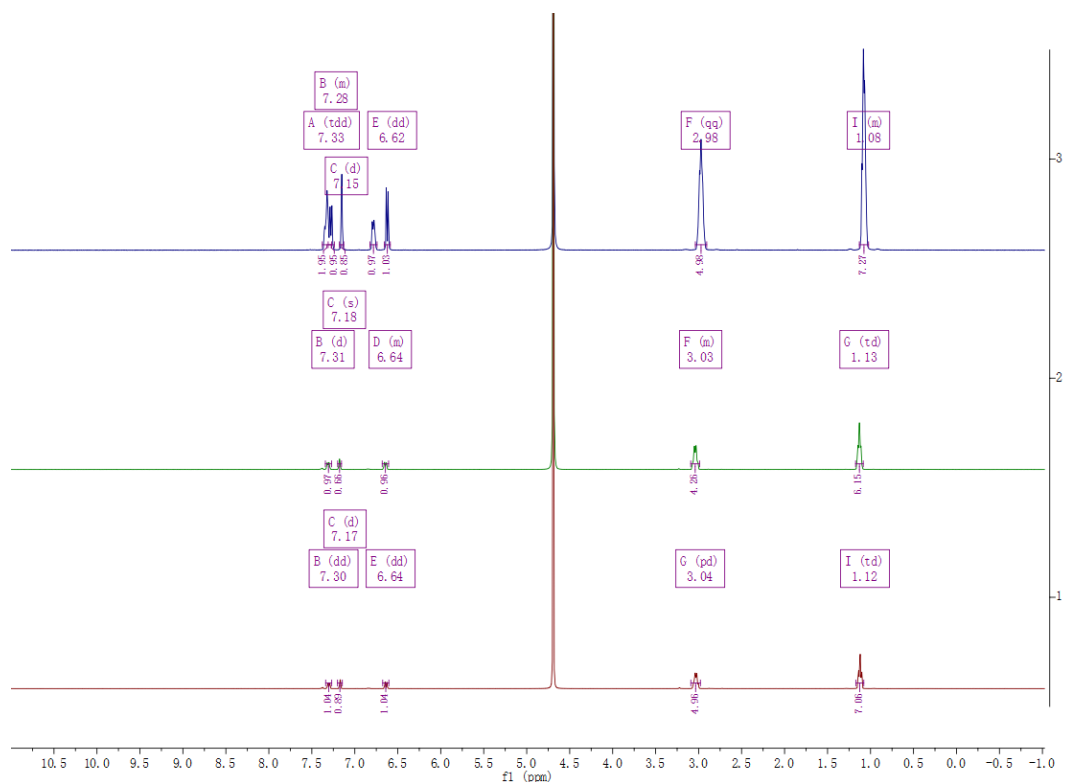

Figure S12  $^1\text{H}$  NMR ( $\text{D}_2\text{O}$ ) of  $[\text{Et}_3\text{NH}]_2[\text{H}_3\text{L-Ge}]$  (bottom),  $[\text{Et}_3\text{NH}]_2[\text{H}_3\text{L-Ge}]$  heated at  $80^\circ\text{C}$  for 3 days (middle), and the mixture of 3,4-dihydroxybenzoic acid and  $[\text{Et}_3\text{NH}]_2[\text{H}_3\text{L-Ge}]$  (top).

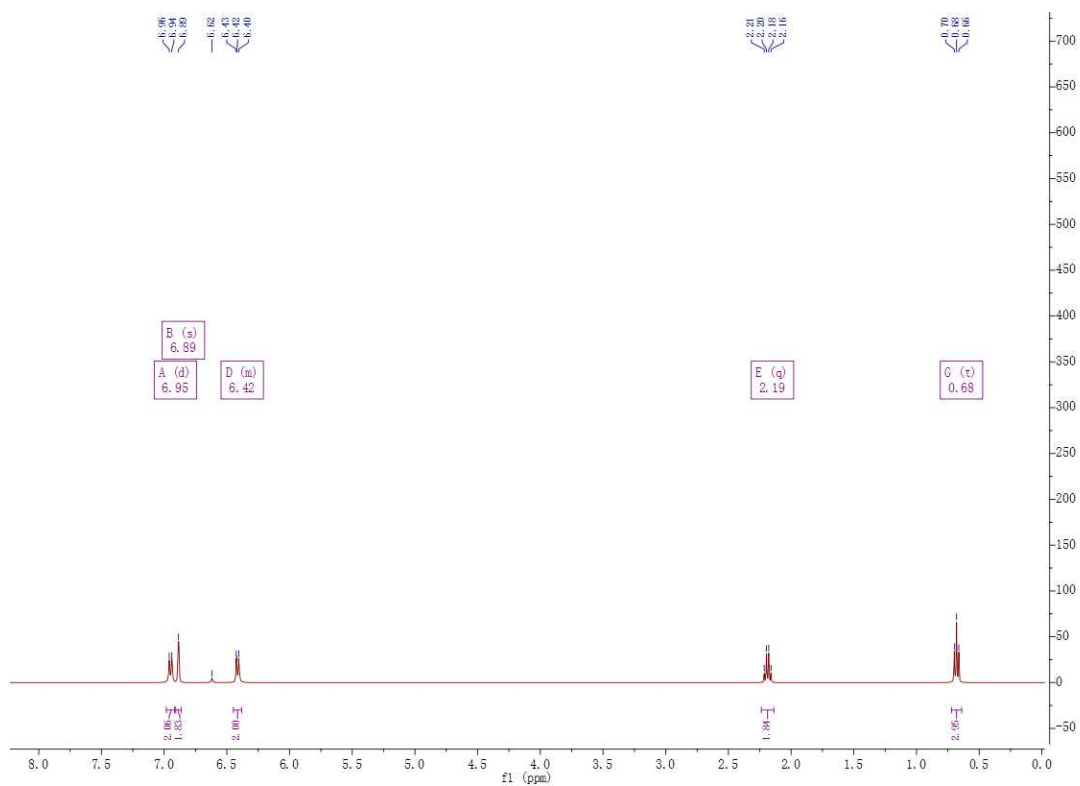

Figure S13  $^1\text{H}$  NMR of digested **IMP-33-Sc** ( $\text{NaOD}$  in  $\text{D}_2\text{O}$ )

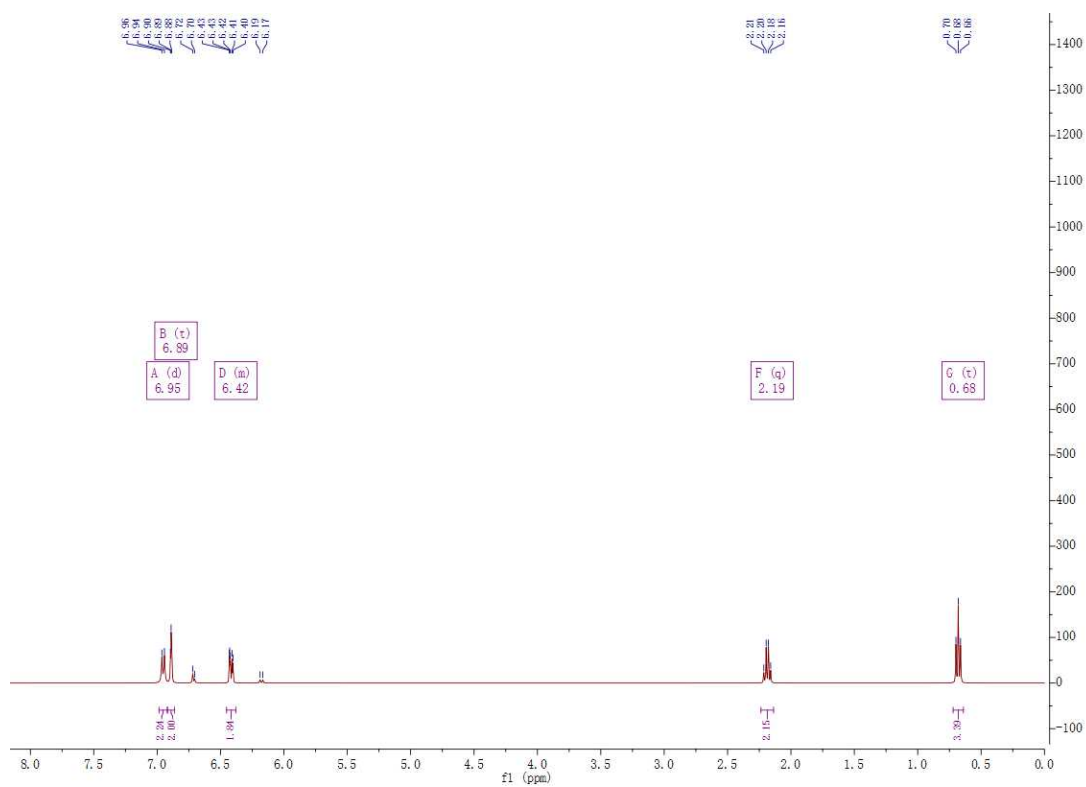

Figure S14  $^1\text{H}$  NMR of digested **IMP-34-Y** (NaOD in  $\text{D}_2\text{O}$ ).

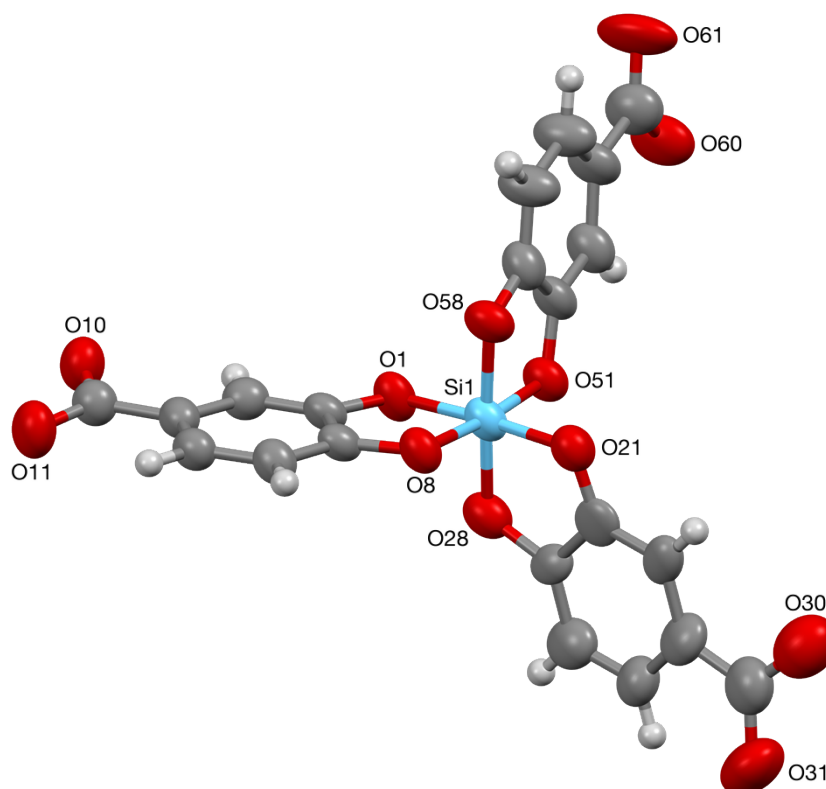

Figure S15 The structure of the di-anion present in the crystal of  $[\text{Et}_3\text{NH}]_2[\text{H}_3\text{L-Si}]$  (50% probability ellipsoids).



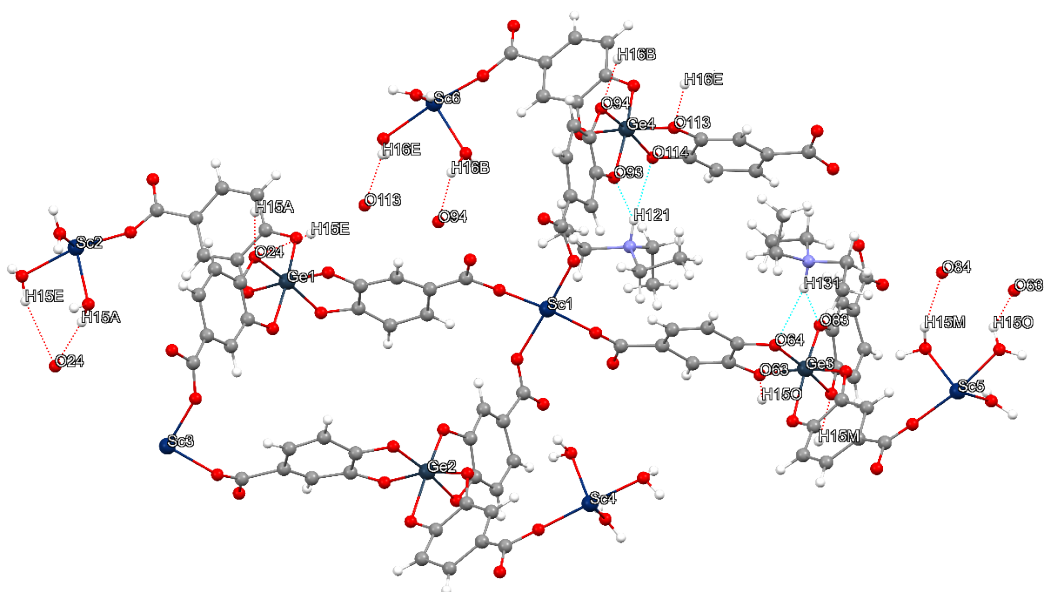

Figure S16 Crystal structure of **IMP-33-Sc** (asymmetric unit) with hydrogen bonds (red and blue dotted lines).

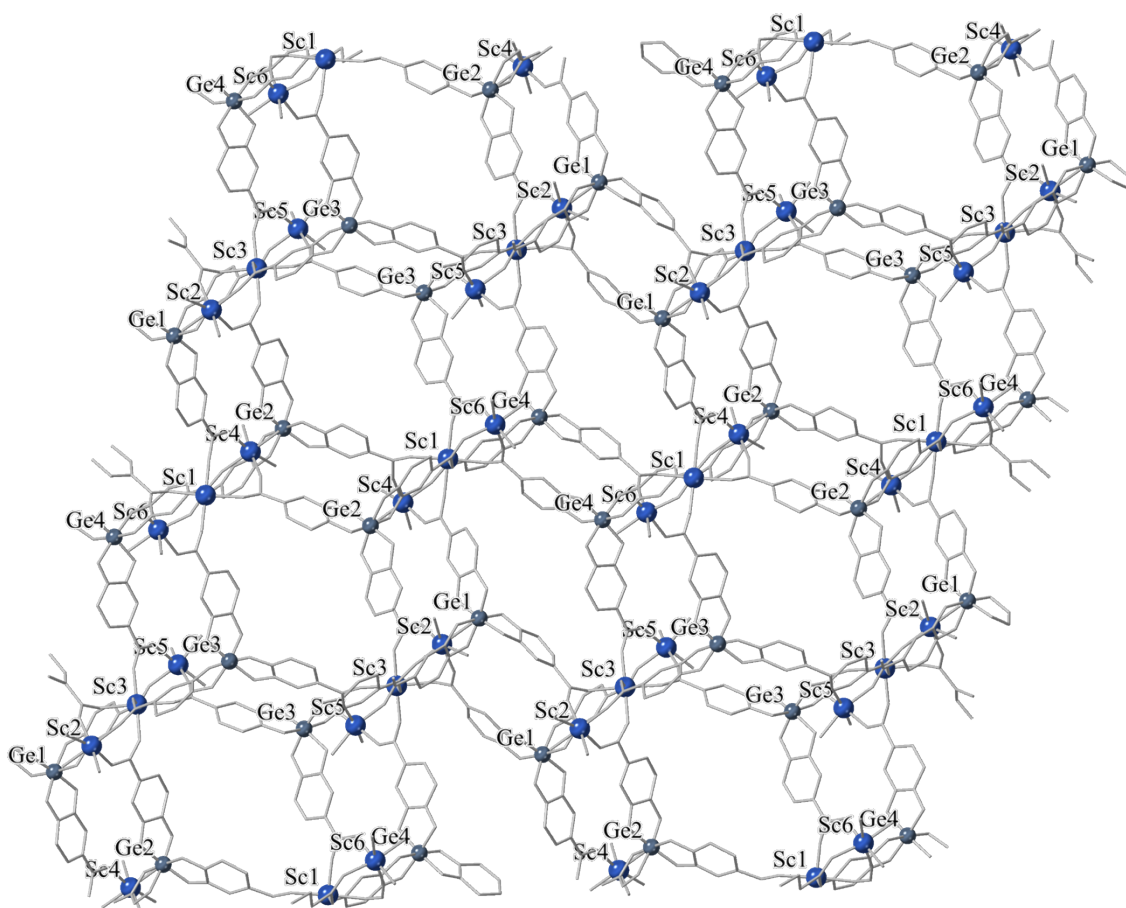

Figure S17 Packing structure of **IMP-33-Sc** showing two types of SBU (Sc1, Sc4, Sc6 and Sc2, Sc3, Sc5), ammonium cations and H atoms are not shown for clarity.

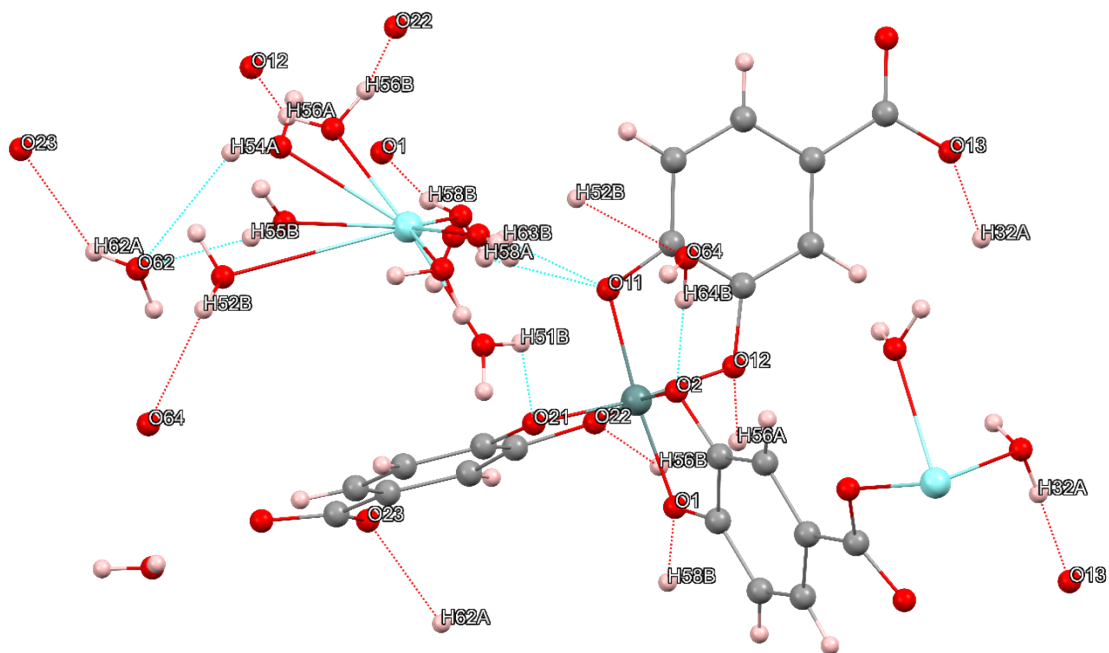

Figure S18 H-bonding interactions in **IMP-34-Y** (red and blue dotted lines).

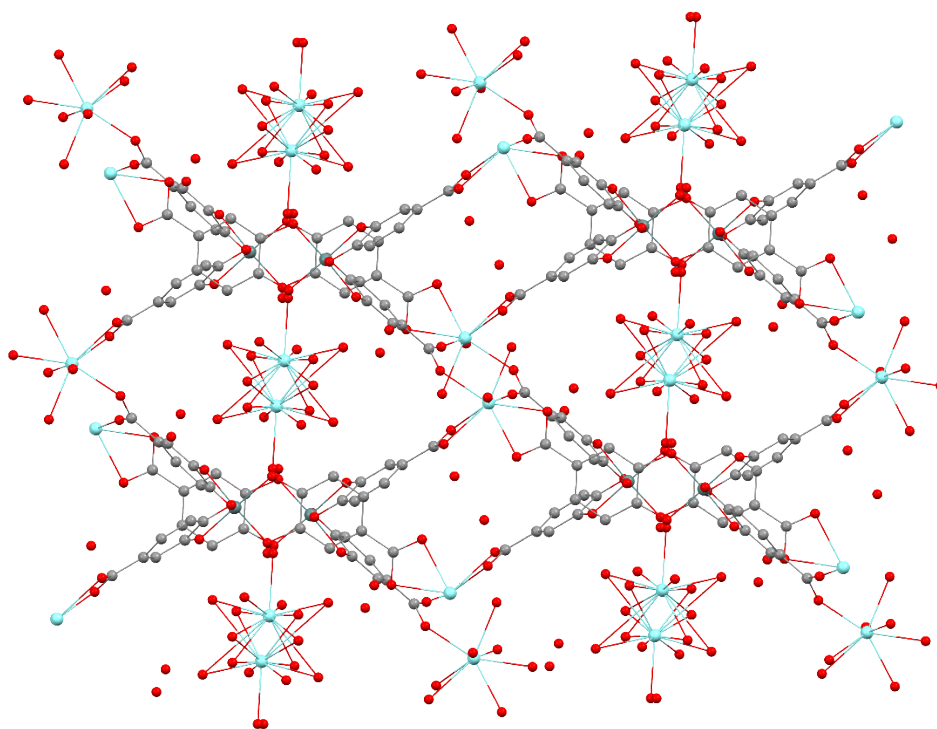

Figure S19 Packing diagram of **IMP-34-Y** (0 1 0), with molecules occupying void space. H atoms are omitted for clarity.

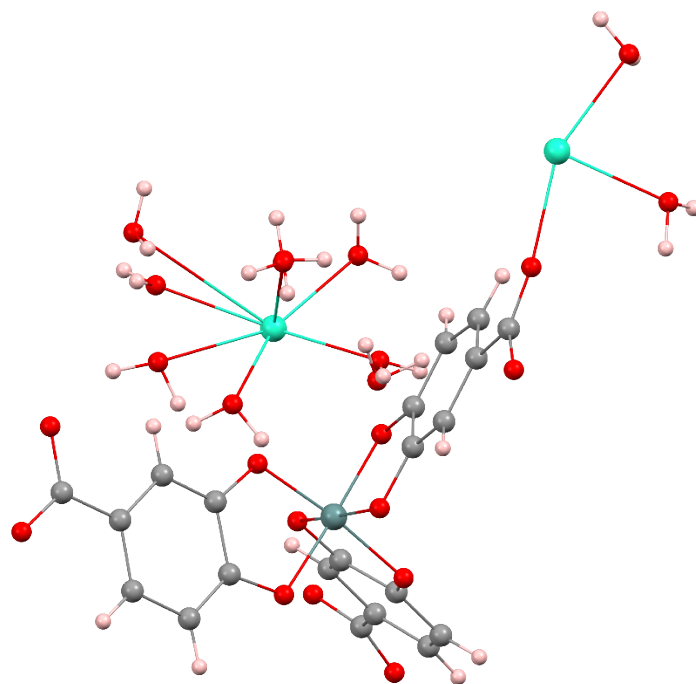

Figure S20 Crystal structure of **IMP-34-Dy** (asymmetric unit).

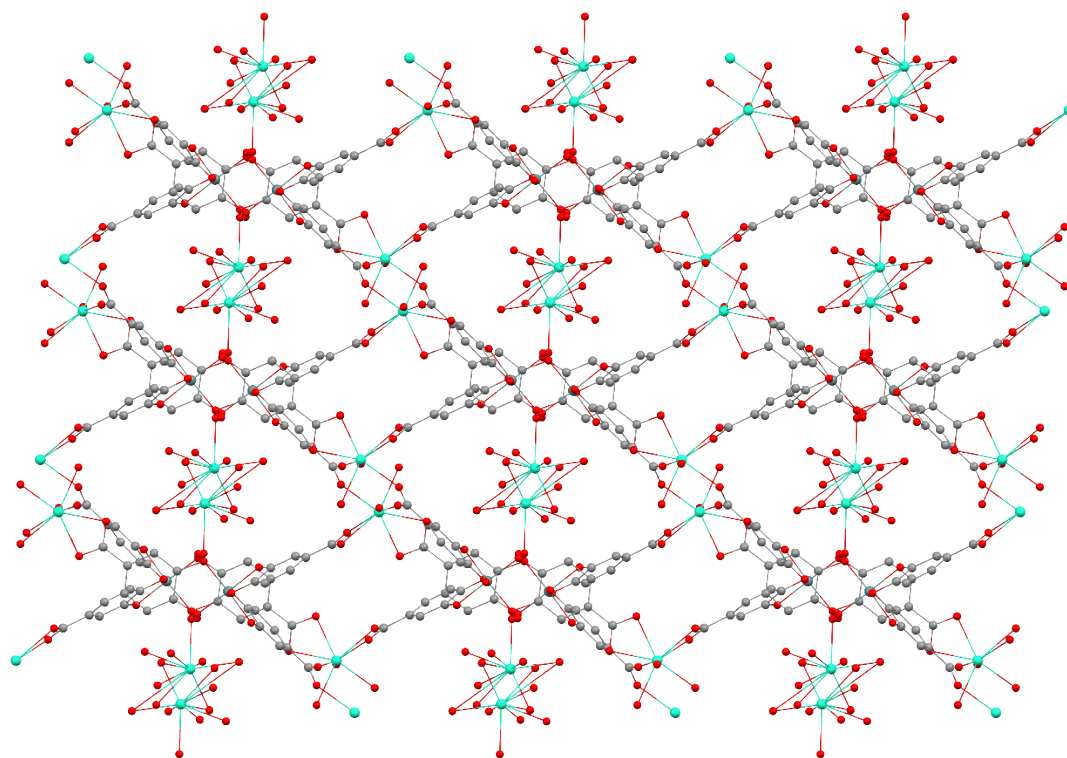

Figure S21 Packing diagram of **IMP-34-Dy**.

## Notes on the X-ray crystal structure of [Et<sub>3</sub>NH]<sub>2</sub>[H<sub>3</sub>L-Si]

*Crystal data for [Et<sub>3</sub>NH]<sub>2</sub>[H<sub>3</sub>L-Si]:* [C<sub>21</sub>H<sub>12</sub>O<sub>12</sub>Si](C<sub>6</sub>H<sub>16</sub>N)<sub>2</sub>·3(C<sub>3</sub>H<sub>7</sub>NO), *M* = 908.08, triclinic, *P*-1 (no. 2), *a* = 9.8788(4), *b* = 14.7468(7), *c* = 16.5789(8) Å,  $\alpha$  = 95.373(4),  $\beta$  = 90.577(4),  $\gamma$  = 97.219(4)°, *V* = 2384.97(19) Å<sup>3</sup>, *Z* = 2, *D<sub>c</sub>* = 1.265 g cm<sup>-3</sup>,  $\mu$ (Mo-K $\alpha$ ) = 0.119 mm<sup>-1</sup>, *T* = 173 K, colourless tablets, Agilent Xcalibur 3 E diffractometer; 9373 independent measured reflections (*R*<sub>int</sub> = 0.0308), *F*<sup>2</sup> refinement,<sup>2-4</sup> *R*<sub>1</sub>(obs) = 0.01042, *wR*<sub>2</sub>(all) = 0.3578, 4837 independent observed absorption-corrected reflections [*|F<sub>o</sub> |* > 4 $\sigma$ (*|F<sub>o</sub> |*)], completeness to  $\theta_{\text{full}}$ (25.2°) = 98.5%], 505 parameters.

The -C<sub>6</sub>H<sub>3</sub>CO<sub>2</sub>H portion of the O21-based dihydroxybenzoate moiety, and the whole of both the N70- and N80-based triethylammonium cations were all found to be disordered, and in each case two orientations were identified of *ca.* 64:36, 69:31 and 66:34% occupancy respectively. The geometries of each pair of orientations were optimised, the thermal parameters of adjacent atoms were restrained to be similar, and only the non-hydrogen atoms of the major occupancy orientations were refined anisotropically (those of the minor occupancy orientations were refined isotropically). The presumed O-H hydrogen atoms of the C9-, C29- and C59-based carboxylate groups, and the presumed N-H hydrogen atoms of the two disordered triethylammonium cations, could not be located. Whilst the latter were placed in idealised positions with an N-H distance of 0.90 Å, the former were omitted, making the atom list for the asymmetric unit low by 3H. The included solvent was found to be highly disordered, and the best approach to handling this diffuse electron density was found to be the SQUEEZE routine of PLATON.<sup>5</sup> This suggested a total of 229 electrons per unit cell, equivalent to 114.5 electrons per asymmetric unit. Before the use of SQUEEZE the solvent clearly resembled dimethylformamide (C<sub>3</sub>H<sub>7</sub>NO, 40 electrons) distributed over three sites, and three dimethylformamide molecules corresponds to 120 electrons, so this was used as the solvent present. As a result, the atom list for the asymmetric unit is low by 3(C<sub>3</sub>H<sub>7</sub>NO) + 3H = C<sub>9</sub>H<sub>24</sub>N<sub>3</sub>O<sub>3</sub> (and that for the unit cell low by C<sub>18</sub>H<sub>48</sub>N<sub>6</sub>O<sub>6</sub>) compared to what is actually presumed to be present. All this disorder (which amounts to *ca.* 62% of the total electrons in the structure) has a marked impact on the intensity distribution of the data set, with the drop off at higher angles being significantly steeper than would otherwise be expected to be the case, as can be seen from the mean *F*<sup>2</sup>/ $\sigma$ (*F*<sup>2</sup>) column of Table S1 below.

**Table S1.** Statistics vs resolution (taking redundancy into account) - point group symmetry: P-1.

| resolution | # kept | # theory | # unique | % complete | average redundancy | mean F2  | mean F2/sig(F2) | Rint  | RsigmaB |
|------------|--------|----------|----------|------------|--------------------|----------|-----------------|-------|---------|
| inf-1.74   | 2617   | 945      | 939      | 99.4       | 2.8                | 42668.13 | 52.87           | 0.026 | 0.011   |
| 1.74-1.38  | 1933   | 943      | 939      | 99.6       | 2.1                | 9257.88  | 17.31           | 0.028 | 0.037   |
| 1.38-1.21  | 1631   | 943      | 939      | 99.6       | 1.7                | 4559.36  | 9.34            | 0.050 | 0.063   |
| 1.21-1.10  | 1428   | 940      | 939      | 99.9       | 1.5                | 3941.75  | 7.50            | 0.067 | 0.077   |
| 1.10-1.02  | 1218   | 940      | 939      | 99.9       | 1.3                | 1910.68  | 3.84            | 0.107 | 0.150   |
| 1.02-0.96  | 1127   | 942      | 939      | 99.7       | 1.2                | 1090.37  | 2.27            | 0.213 | 0.269   |
| 0.96-0.91  | 1060   | 947      | 939      | 99.2       | 1.1                | 726.51   | 1.55            | 0.268 | 0.373   |
| 0.91-0.87  | 1003   | 956      | 939      | 98.2       | 1.1                | 560.57   | 1.20            | 0.306 | 0.392   |
| 0.87-0.84  | 975    | 997      | 939      | 94.2       | 1.0                | 456.22   | 0.93            | 0.262 | 0.333   |
| 0.84-0.75  | 979    | 3250     | 947      | 29.1       | 1.0                | 355.01   | 0.73            | 0.365 | 0.465   |
| inf-0.75   | 13971  | 11803    | 9398     | 79.6       | 1.5                | 10615.12 | 14.99           | 0.030 | 0.024   |
| inf-0.84   | 12886  | 8435     | 8348     | 99.0       | 1.5                | 11479.50 | 16.19           | 0.030 | 0.024   |

### **Notes on the X-ray crystal structure of IMP-33-Sc**

The structure was solved as an inversion twin (Flack parameter: 0.499(8)). Attempts at solving in higher symmetry space groups failed and nothing was suggested using ADDSYM in PLATON.<sup>5</sup> Various restraints (DFIX, SADI, RIGU and SIMU) were employed based on the assumption that like molecules within the sub-structure would be expected to have near identical geometries. There were also some highly disordered solvent cavities for which a solvent mask was calculated and 908 electrons were found in a volume of 3887Å<sup>3</sup> in 1 void per unit cell. This is consistent with the presence of 6[C<sub>2</sub>H<sub>3</sub>N], 9[H<sub>2</sub>O] per asymmetric unit which account for 888 electrons per unit cell.

### **Notes on the X-ray crystal structure of IMP-34-Y**

The crystal used was a non-merohedral twin (180° rotation about the reciprocal axis 0 0 1) with ratio 52:48. The overall structure as currently presented does not charge balance, at -0.5 for the asymmetric unit, with the required +0.5 charge assumed to come from a disordered Et<sub>3</sub>NH cation mixed in with the solvent water. It was just not possible to locate this disordered cation in the cavities, along with highly disordered solvent, that was assumed to be water (8 per asymmetric unit). For this the SQUEEZE program within PLATON was used,<sup>5</sup> which suggested a solvent accessible volume of 3107Å<sup>3</sup>, accounting for 934 electrons per unit cell (117 electrons per asymmetric unit, with 8 water and ½ Et<sub>3</sub>NH = 110). Finally, the disordered hydrated Y cation lies just slightly off-set over a symmetry site, requiring the use of various restraints (SADI, BUMP, RIGU, SIMU) but was finally held as a rigid body.

### **Notes on the X-ray crystal structure of IMP-34-Dy**

The crystal used was a non-merohedral twin (180° rotation about the reciprocal axis 0 0 1) with ratio 54:46. The overall structure as currently presented does not charge balance, at -0.5 for the asymmetric unit, with the required +0.5 charge assumed to come from a disordered Et<sub>3</sub>NH cation mixed in with the solvent water. It was just not possible to locate this disordered cation in the cavities, along with highly disordered solvent, that was assumed to be water (9 per asymmetric unit). For this the SQUEEZE program within PLATON was used,<sup>5</sup> which suggested a solvent accessible volume of 3448Å<sup>3</sup>, accounting for 980 electrons per unit cell (123 electrons per asymmetric unit, with 9 water and ½ Et<sub>3</sub>NH = 120). Finally, the disordered hydrated Dy cation lies just slightly off-set over a symmetry site, requiring the use of various restraints (DELU, SIMU) but was finally held as a rigid body.

Table S2 Crystallography data

| Compound                                    | [Et <sub>3</sub> NH] <sub>2</sub> [H <sub>3</sub> L-Si]                                                                                    | IMP-33-Sc                                                                                                                                                                         | IMP-34-Y                                                                                                                                  | IMP-34-Dy                                                                                                                                |
|---------------------------------------------|--------------------------------------------------------------------------------------------------------------------------------------------|-----------------------------------------------------------------------------------------------------------------------------------------------------------------------------------|-------------------------------------------------------------------------------------------------------------------------------------------|------------------------------------------------------------------------------------------------------------------------------------------|
| CCDC                                        | 2331262                                                                                                                                    | 2348717                                                                                                                                                                           | 2348718                                                                                                                                   | 2348719                                                                                                                                  |
| Formula                                     | [C <sub>21</sub> H <sub>12</sub> O <sub>12</sub> Si](C <sub>6</sub> H <sub>16</sub> N) <sub>2</sub><br>3(C <sub>3</sub> H <sub>7</sub> NO) | C <sub>42</sub> H <sub>30</sub> Ge <sub>2</sub> O <sub>30</sub> Sc <sub>3</sub> ,<br>C <sub>6</sub> H <sub>16</sub> N, 6(C <sub>2</sub> H <sub>3</sub> N),<br>9(H <sub>2</sub> O) | C <sub>42</sub> H <sub>26</sub> Ge <sub>2</sub> O <sub>28</sub> Y <sub>2</sub> ,<br>5(H <sub>2</sub> O), H <sub>16</sub> O <sub>8</sub> Y | C <sub>42</sub> H <sub>26</sub> Ge <sub>2</sub> O <sub>28</sub> Dy <sub>2</sub> ,<br>H <sub>16</sub> O <sub>8</sub> Dy, H <sub>2</sub> O |
| Formula weight                              | 908.08                                                                                                                                     | 1805.38                                                                                                                                                                           | 1624.74                                                                                                                                   | 1773.45                                                                                                                                  |
| Crystal system                              | Triclinic                                                                                                                                  | Monoclinic                                                                                                                                                                        | Monoclinic                                                                                                                                | Monoclinic                                                                                                                               |
| Space group                                 | P-1                                                                                                                                        | P2 <sub>1</sub>                                                                                                                                                                   | C2/c                                                                                                                                      | C2/c                                                                                                                                     |
| a / Å                                       | 9.8788(4)                                                                                                                                  | 25.1090(8)                                                                                                                                                                        | 19.9205(2)                                                                                                                                | 19.5343(3)                                                                                                                               |
| b / Å                                       | 14.7468(7)                                                                                                                                 | 13.1102(2)                                                                                                                                                                        | 14.33510(10)                                                                                                                              | 14.22670(10)                                                                                                                             |
| c / Å                                       | 16.5789(8)                                                                                                                                 | 27.1137(6)                                                                                                                                                                        | 30.7566(2)                                                                                                                                | 30.9853(3)                                                                                                                               |
| α / deg                                     | 95.373(4)                                                                                                                                  | 90                                                                                                                                                                                | 90                                                                                                                                        | 90                                                                                                                                       |
| β / deg                                     | 90.577(4)                                                                                                                                  | 107.410(3)                                                                                                                                                                        | 97.0890(10)                                                                                                                               | 96.9100(10)                                                                                                                              |
| γ / deg                                     | 97.219(4)                                                                                                                                  | 90                                                                                                                                                                                | 90                                                                                                                                        | 90                                                                                                                                       |
| V / Å <sup>3</sup>                          | 2384.97(19)                                                                                                                                | 8516.5(4)                                                                                                                                                                         | 8715.79(12)                                                                                                                               | 8548.53(17)                                                                                                                              |
| Z                                           | 2                                                                                                                                          | 4                                                                                                                                                                                 | 4                                                                                                                                         | 4                                                                                                                                        |
| D <sub>calc.</sub> mg/mm <sup>3</sup>       | 1.265                                                                                                                                      | 1.408                                                                                                                                                                             | 1.238                                                                                                                                     | 1.378                                                                                                                                    |
| Radiation used                              | Mo K <sub>α</sub>                                                                                                                          | Mo K <sub>α</sub>                                                                                                                                                                 | Cu K <sub>α</sub>                                                                                                                         | Cu K <sub>α</sub>                                                                                                                        |
| Temperature / K                             | 173(2)                                                                                                                                     | 100(2)                                                                                                                                                                            | 100(2)                                                                                                                                    | 100(2)                                                                                                                                   |
| Absorption coefficient /mm <sup>-1</sup>    | 0.119                                                                                                                                      | 1.014                                                                                                                                                                             | 4.018                                                                                                                                     | 15.185                                                                                                                                   |
| θ range / deg                               | 2.353 to 28.269                                                                                                                            | 2.076 to 28.701                                                                                                                                                                   | 2.896 to 68.273                                                                                                                           | 2.873 to 70.051                                                                                                                          |
| No. of unique reflections                   | 13899                                                                                                                                      | 43773                                                                                                                                                                             | 27185                                                                                                                                     | 13640                                                                                                                                    |
| R <sub>1</sub> (obs), wR <sub>2</sub> (all) | 0.1042, 0.3578                                                                                                                             | 0.0683, 0.1823                                                                                                                                                                    | 0.0658, 0.1842                                                                                                                            | 0.0558, 0.1511                                                                                                                           |

Table S3. Selected bond lengths and angles for IMP-33-Sc

| Atom | Atom              | Length/Å | Atom | Atom              | Length/Å                                                                                               |
|------|-------------------|----------|------|-------------------|--------------------------------------------------------------------------------------------------------|
| Ge1  | 03                | 1.829(5) | Sc2  | 0151              | 2.199(5)                                                                                               |
| Ge1  | 04                | 1.915(5) | Sc2  | 0152              | 2.132(6)                                                                                               |
| Ge1  | 013               | 1.900(5) | Sc2  | 0153              | 2.169(6)                                                                                               |
| Ge1  | 014               | 1.817(5) | Sc3  | 011 <sup>4</sup>  | 2.097(5)                                                                                               |
| Ge1  | 023               | 1.960(5) | Sc3  | 022               | 1.991(5)                                                                                               |
| Ge1  | 024               | 1.850(5) | Sc3  | 041               | 2.075(6)                                                                                               |
| Ge2  | 033               | 1.762(5) | Sc3  | 071 <sup>5</sup>  | 2.057(5)                                                                                               |
| Ge2  | 034               | 1.951(6) | Sc3  | 082 <sup>6</sup>  | 2.127(5)                                                                                               |
| Ge2  | 043               | 1.913(5) | Sc3  | 0111 <sup>6</sup> | 2.054(5)                                                                                               |
| Ge2  | 044               | 1.807(7) | Sc4  | 02 <sup>5</sup>   | 2.081(5)                                                                                               |
| Ge2  | 053               | 1.847(6) | Sc4  | 052               | 2.077(6)                                                                                               |
| Ge2  | 054               | 1.981(6) | Sc4  | 091 <sup>5</sup>  | 2.058(5)                                                                                               |
| Ge3  | 063               | 1.931(5) | Sc4  | 0154              | 2.050(6)                                                                                               |
| Ge3  | 064               | 1.787(5) | Sc4  | 0155              | 2.117(6)                                                                                               |
| Ge3  | 073               | 1.812(5) | Sc4  | 0156              | 2.091(5)                                                                                               |
| Ge3  | 074               | 2.032(5) | Sc5  | 021 <sup>1</sup>  | 2.058(5)                                                                                               |
| Ge3  | 083               | 1.812(5) | Sc5  | 072               | 2.082(5)                                                                                               |
| Ge3  | 084               | 1.952(5) | Sc5  | 0112 <sup>7</sup> | 2.077(5)                                                                                               |
| Ge4  | 093               | 1.912(5) | Sc5  | 0157              | 2.078(5)                                                                                               |
| Ge4  | 094               | 1.857(5) | Sc5  | 0158              | 2.116(5)                                                                                               |
| Ge4  | 0103              | 1.926(5) | Sc5  | 0159              | 2.127(6)                                                                                               |
| Ge4  | 0104              | 1.736(5) | Sc6  | 031 <sup>8</sup>  | 2.090(6)                                                                                               |
| Ge4  | 0113              | 1.874(5) | Sc6  | 062 <sup>8</sup>  | 2.044(6)                                                                                               |
| Ge4  | 0114              | 1.974(5) | Sc6  | 0102              | 1.999(5)                                                                                               |
| Sc1  | 01                | 1.947(6) | Sc6  | 0160              | 2.118(5)                                                                                               |
| Sc1  | 032               | 2.130(5) | Sc6  | 0161              | 2.083(6)                                                                                               |
| Sc1  | 051 <sup>1</sup>  | 2.128(7) | Sc6  | 0162              | 2.172(5)                                                                                               |
| Sc1  | 061               | 2.066(6) | ---- |                   |                                                                                                        |
| Sc1  | 092               | 2.006(5) |      |                   | <sup>1</sup> 1-x,1/2+y,-z; <sup>2</sup> 1-x,-1/2+y,1-z; <sup>3</sup> 2-x,1/2+y,1-z; <sup>4</sup> 2-x,- |
| Sc1  | 0101 <sup>2</sup> | 2.108(5) |      |                   | 1/2+y,1-z; <sup>5</sup> 1-x,-1/2+y,-z; <sup>6</sup> 1+x,-1+y,+z; <sup>7</sup> -x,-1/2+y,-z;            |
| Sc2  | 012               | 2.035(5) |      |                   | <sup>8</sup> 1-x,1/2+y,1-z                                                                             |
| Sc2  | 042 <sup>3</sup>  | 2.030(5) |      |                   |                                                                                                        |
| Sc2  | 081 <sup>2</sup>  | 2.067(6) |      |                   |                                                                                                        |

  

| Atom | Atom | Atom | Angle/°  | Atom | Atom | Atom | Angle/°  |
|------|------|------|----------|------|------|------|----------|
| 03   | Ge1  | 04   | 86.3(2)  | 033  | Ge2  | 054  | 174.4(3) |
| 03   | Ge1  | 013  | 174.9(2) | 034  | Ge2  | 054  | 86.8(3)  |
| 03   | Ge1  | 023  | 93.6(2)  | 043  | Ge2  | 034  | 84.5(2)  |
| 03   | Ge1  | 024  | 90.7(2)  | 043  | Ge2  | 054  | 79.5(2)  |
| 04   | Ge1  | 023  | 85.9(2)  | 044  | Ge2  | 034  | 170.6(2) |
| 013  | Ge1  | 04   | 88.8(2)  | 044  | Ge2  | 043  | 86.1(3)  |
| 013  | Ge1  | 023  | 87.3(2)  | 044  | Ge2  | 053  | 98.0(3)  |
| 014  | Ge1  | 03   | 91.9(2)  | 044  | Ge2  | 054  | 91.3(3)  |
| 014  | Ge1  | 04   | 95.2(2)  | 053  | Ge2  | 034  | 91.1(3)  |
| 014  | Ge1  | 013  | 87.3(2)  | 053  | Ge2  | 043  | 166.1(3) |
| 014  | Ge1  | 023  | 174.4(2) | 053  | Ge2  | 054  | 87.1(3)  |
| 014  | Ge1  | 024  | 93.3(2)  | 063  | Ge3  | 074  | 85.1(2)  |
| 024  | Ge1  | 04   | 171.1(2) | 063  | Ge3  | 084  | 85.0(2)  |
| 024  | Ge1  | 013  | 94.4(2)  | 064  | Ge3  | 063  | 85.8(2)  |
| 024  | Ge1  | 023  | 86.0(2)  | 064  | Ge3  | 073  | 93.9(2)  |
| 033  | Ge2  | 034  | 87.8(3)  | 064  | Ge3  | 074  | 92.5(2)  |
| 033  | Ge2  | 043  | 98.7(3)  | 064  | Ge3  | 083  | 95.5(2)  |
| 033  | Ge2  | 044  | 93.9(3)  | 064  | Ge3  | 084  | 170.7(2) |
| 033  | Ge2  | 053  | 94.2(3)  | 073  | Ge3  | 063  | 168.9(2) |

| Atom              | Atom | Atom              | Angle/°   |
|-------------------|------|-------------------|-----------|
| 073               | Ge3  | 074               | 83.9(2)   |
| 073               | Ge3  | 084               | 95.4(2)   |
| 083               | Ge3  | 063               | 93.6(2)   |
| 083               | Ge3  | 073               | 97.4(2)   |
| 083               | Ge3  | 074               | 171.8(2)  |
| 083               | Ge3  | 084               | 83.8(2)   |
| 084               | Ge3  | 074               | 88.1(2)   |
| 093               | Ge4  | 0103              | 87.3(2)   |
| 093               | Ge4  | 0114              | 86.9(2)   |
| 094               | Ge4  | 093               | 85.4(2)   |
| 094               | Ge4  | 0103              | 94.2(2)   |
| 094               | Ge4  | 0113              | 92.8(2)   |
| 094               | Ge4  | 0114              | 172.3(2)  |
| 0103              | Ge4  | 0114              | 86.2(2)   |
| 0104              | Ge4  | 093               | 173.3(2)  |
| 0104              | Ge4  | 094               | 96.1(2)   |
| 0104              | Ge4  | 0103              | 86.0(2)   |
| 0104              | Ge4  | 0113              | 94.3(2)   |
| 0104              | Ge4  | 0114              | 91.6(2)   |
| 0113              | Ge4  | 093               | 92.2(2)   |
| 0113              | Ge4  | 0103              | 172.9(2)  |
| 0113              | Ge4  | 0114              | 86.7(2)   |
| 01                | Sc1  | 032               | 87.0(2)   |
| 01                | Sc1  | 051 <sup>1</sup>  | 89.7(3)   |
| 01                | Sc1  | 061               | 175.0(2)  |
| 01                | Sc1  | 092               | 89.6(2)   |
| 01                | Sc1  | 0101 <sup>2</sup> | 87.6(2)   |
| 051 <sup>1</sup>  | Sc1  | 032               | 87.0(2)   |
| 061               | Sc1  | 032               | 88.0(2)   |
| 061               | Sc1  | 051 <sup>1</sup>  | 90.6(3)   |
| 061               | Sc1  | 0101 <sup>2</sup> | 92.1(2)   |
| 092               | Sc1  | 032               | 176.3(2)  |
| 092               | Sc1  | 051 <sup>1</sup>  | 91.4(2)   |
| 092               | Sc1  | 061               | 95.4(2)   |
| 092               | Sc1  | 0101 <sup>2</sup> | 89.1(2)   |
| 0101 <sup>2</sup> | Sc1  | 032               | 92.3(2)   |
| 0101 <sup>2</sup> | Sc1  | 051 <sup>1</sup>  | 177.2(3)  |
| 012               | Sc2  | 081 <sup>2</sup>  | 91.3(2)   |
| 012               | Sc2  | 0151              | 87.7(2)   |
| 012               | Sc2  | 0152              | 88.1(2)   |
| 012               | Sc2  | 0153              | 167.2(2)  |
| 042 <sup>3</sup>  | Sc2  | 012               | 103.4(2)  |
| 042 <sup>3</sup>  | Sc2  | 081 <sup>2</sup>  | 96.9(2)   |
| 042 <sup>3</sup>  | Sc2  | 0151              | 164.1(2)  |
| 042 <sup>3</sup>  | Sc2  | 0152              | 84.9(2)   |
| 042 <sup>3</sup>  | Sc2  | 0153              | 89.4(2)   |
| 081 <sup>2</sup>  | Sc2  | 0151              | 94.2(2)   |
| 081 <sup>2</sup>  | Sc2  | 0152              | 178.2(3)  |
| 081 <sup>2</sup>  | Sc2  | 0153              | 88.5(2)   |
| 0152              | Sc2  | 0151              | 84.1(2)   |
| 0152              | Sc2  | 0153              | 91.7(2)   |
| 0153              | Sc2  | 0151              | 79.5(2)   |
| 011 <sup>4</sup>  | Sc3  | 082 <sup>5</sup>  | 90.33(19) |
| 022               | Sc3  | 011 <sup>4</sup>  | 88.9(2)   |
| 022               | Sc3  | 041               | 92.7(2)   |
| 022               | Sc3  | 071 <sup>6</sup>  | 92.8(2)   |
| 022               | Sc3  | 082 <sup>5</sup>  | 176.0(2)  |
| 022               | Sc3  | 0111 <sup>5</sup> | 92.1(2)   |

| Atom              | Atom | Atom              | Angle/°  |
|-------------------|------|-------------------|----------|
| 041               | Sc3  | 011 <sup>4</sup>  | 90.1(2)  |
| 041               | Sc3  | 082 <sup>5</sup>  | 83.4(2)  |
| 071 <sup>6</sup>  | Sc3  | 011 <sup>4</sup>  | 176.6(2) |
| 071 <sup>6</sup>  | Sc3  | 041               | 86.9(2)  |
| 071 <sup>6</sup>  | Sc3  | 082 <sup>5</sup>  | 87.7(2)  |
| 0111 <sup>5</sup> | Sc3  | 011 <sup>4</sup>  | 89.3(2)  |
| 0111 <sup>5</sup> | Sc3  | 041               | 175.2(2) |
| 0111 <sup>5</sup> | Sc3  | 071 <sup>6</sup>  | 93.6(2)  |
| 0111 <sup>5</sup> | Sc3  | 082 <sup>5</sup>  | 91.8(2)  |
| 02 <sup>6</sup>   | Sc4  | 0155              | 85.5(3)  |
| 02 <sup>6</sup>   | Sc4  | 0156              | 84.7(2)  |
| 052               | Sc4  | 02 <sup>6</sup>   | 95.2(2)  |
| 052               | Sc4  | 0155              | 83.4(2)  |
| 052               | Sc4  | 0156              | 174.9(2) |
| 091 <sup>6</sup>  | Sc4  | 02 <sup>6</sup>   | 92.6(2)  |
| 091 <sup>6</sup>  | Sc4  | 052               | 95.4(2)  |
| 091 <sup>6</sup>  | Sc4  | 0155              | 177.7(2) |
| 091 <sup>6</sup>  | Sc4  | 0156              | 89.7(2)  |
| 0154              | Sc4  | 02 <sup>6</sup>   | 169.7(3) |
| 0154              | Sc4  | 052               | 90.0(2)  |
| 0154              | Sc4  | 091 <sup>6</sup>  | 95.7(3)  |
| 0154              | Sc4  | 0155              | 86.3(3)  |
| 0154              | Sc4  | 0156              | 89.2(2)  |
| 0156              | Sc4  | 0155              | 91.5(2)  |
| 021 <sup>1</sup>  | Sc5  | 072               | 98.7(2)  |
| 021 <sup>1</sup>  | Sc5  | 0112 <sup>7</sup> | 86.8(2)  |
| 021 <sup>1</sup>  | Sc5  | 0157              | 97.9(2)  |
| 021 <sup>1</sup>  | Sc5  | 0158              | 83.7(2)  |
| 021 <sup>1</sup>  | Sc5  | 0159              | 164.8(2) |
| 072               | Sc5  | 0158              | 170.0(2) |
| 072               | Sc5  | 0159              | 93.1(2)  |
| 0112 <sup>7</sup> | Sc5  | 072               | 90.1(2)  |
| 0112 <sup>7</sup> | Sc5  | 0157              | 170.1(2) |
| 0112 <sup>7</sup> | Sc5  | 0158              | 99.8(2)  |
| 0112 <sup>7</sup> | Sc5  | 0159              | 83.7(2)  |
| 0157              | Sc5  | 072               | 80.6(2)  |
| 0157              | Sc5  | 0158              | 89.4(2)  |
| 0157              | Sc5  | 0159              | 93.4(2)  |
| 0158              | Sc5  | 0159              | 86.3(2)  |
| 031 <sup>8</sup>  | Sc6  | 0160              | 88.9(2)  |
| 031 <sup>8</sup>  | Sc6  | 0162              | 84.6(2)  |
| 062 <sup>8</sup>  | Sc6  | 031 <sup>8</sup>  | 91.2(3)  |
| 062 <sup>8</sup>  | Sc6  | 0160              | 175.9(2) |
| 062 <sup>8</sup>  | Sc6  | 0161              | 84.2(2)  |
| 062 <sup>8</sup>  | Sc6  | 0162              | 88.1(2)  |
| 0102              | Sc6  | 031 <sup>8</sup>  | 101.4(3) |
| 0102              | Sc6  | 062 <sup>8</sup>  | 99.1(2)  |
| 0102              | Sc6  | 0160              | 84.8(2)  |
| 0102              | Sc6  | 0161              | 89.6(2)  |
| 0102              | Sc6  | 0162              | 170.4(2) |
| 0160              | Sc6  | 0162              | 87.9(2)  |
| 0161              | Sc6  | 031 <sup>8</sup>  | 168.6(3) |
| 0161              | Sc6  | 0160              | 94.9(2)  |
| 0161              | Sc6  | 0162              | 84.8(2)  |

----  
<sup>1</sup>1-x,1/2+y,-z; <sup>2</sup>1-x,-1/2+y,1-z; <sup>3</sup>2-x,1/2+y,1-z; <sup>4</sup>2-x,-1/2+y,1-z; <sup>5</sup>1+x,-1+y,+z; <sup>6</sup>1-x,-1/2+y,-z; <sup>7</sup>-x,-1/2+y,-z; <sup>8</sup>1-x,1/2+y,1-z; <sup>9</sup>-1+x,1+y,+z; <sup>10</sup>-x,1/2+y,-z



Table S4. Selected bond lengths and angles for **IMP-34-Y**

| Atom | Atom             | Length/Å | Atom | Atom | Length/Å                                                                              |
|------|------------------|----------|------|------|---------------------------------------------------------------------------------------|
| Y1   | O3               | 2.313(4) | Ge1  | O21  | 1.884(4)                                                                              |
| Y1   | O4 <sup>1</sup>  | 2.258(4) | Ge1  | O22  | 1.880(4)                                                                              |
| Y1   | O13 <sup>2</sup> | 2.375(4) | Y5   | O56  | 2.3296                                                                                |
| Y1   | O14 <sup>2</sup> | 2.446(4) | Y5   | O51  | 2.3376                                                                                |
| Y1   | O23 <sup>3</sup> | 2.415(4) | Y5   | O52  | 2.3621                                                                                |
| Y1   | O24 <sup>3</sup> | 2.378(4) | Y5   | O53  | 2.3866                                                                                |
| Y1   | O31              | 2.352(4) | Y5   | O57  | 2.3874                                                                                |
| Y1   | O32              | 2.359(4) | Y5   | O55  | 2.4018                                                                                |
| Ge1  | O1               | 1.891(4) | Y5   | O54  | 2.4152                                                                                |
| Ge1  | O2               | 1.888(4) | Y5   | O58  | 2.4447                                                                                |
| Ge1  | O11              | 1.905(4) | ---- |      |                                                                                       |
| Ge1  | O12              | 1.875(5) |      |      | <sup>1</sup> 1-x,1-y,1-z; <sup>2</sup> 1/2+x,1/2+y,+z; <sup>3</sup> 1/2+x,1/2-y,1/2+z |

  

| Atom             | Atom | Atom             | Angle/°    | Atom | Atom | Atom | Angle/°                                                     |
|------------------|------|------------------|------------|------|------|------|-------------------------------------------------------------|
| O3               | Y1   | O13 <sup>1</sup> | 81.66(15)  | O21  | Ge1  | O2   | 89.70(19)                                                   |
| O3               | Y1   | O14 <sup>1</sup> | 73.96(15)  | O21  | Ge1  | O11  | 88.24(18)                                                   |
| O3               | Y1   | O23 <sup>2</sup> | 143.09(16) | O22  | Ge1  | O1   | 87.85(18)                                                   |
| O3               | Y1   | O24 <sup>2</sup> | 146.92(16) | O22  | Ge1  | O2   | 173.1(2)                                                    |
| O3               | Y1   | O31              | 75.52(16)  | O22  | Ge1  | O11  | 96.54(18)                                                   |
| O3               | Y1   | O32              | 78.20(16)  | O22  | Ge1  | O21  | 87.44(19)                                                   |
| O4 <sup>3</sup>  | Y1   | O3               | 115.03(15) | O56  | Y5   | O51  | 148.1                                                       |
| O4 <sup>3</sup>  | Y1   | O13 <sup>1</sup> | 75.06(14)  | O56  | Y5   | O52  | 108.1                                                       |
| O4 <sup>3</sup>  | Y1   | O14 <sup>1</sup> | 127.08(15) | O56  | Y5   | O53  | 140.3                                                       |
| O4 <sup>3</sup>  | Y1   | O23 <sup>2</sup> | 83.45(15)  | O56  | Y5   | O57  | 76.1                                                        |
| O4 <sup>3</sup>  | Y1   | O24 <sup>2</sup> | 91.57(16)  | O56  | Y5   | O55  | 76.5                                                        |
| O4 <sup>3</sup>  | Y1   | O31              | 152.70(17) | O56  | Y5   | O54  | 69.5                                                        |
| O4 <sup>3</sup>  | Y1   | O32              | 77.28(16)  | O56  | Y5   | O58  | 72.8                                                        |
| O13 <sup>1</sup> | Y1   | O14 <sup>1</sup> | 53.96(13)  | O51  | Y5   | O52  | 77.4                                                        |
| O13 <sup>1</sup> | Y1   | O23 <sup>2</sup> | 135.16(14) | O51  | Y5   | O53  | 71.3                                                        |
| O13 <sup>1</sup> | Y1   | O24 <sup>2</sup> | 87.09(15)  | O51  | Y5   | O57  | 83.8                                                        |
| O23 <sup>2</sup> | Y1   | O14 <sup>1</sup> | 121.64(15) | O51  | Y5   | O55  | 121.1                                                       |
| O24 <sup>2</sup> | Y1   | O14 <sup>1</sup> | 74.27(14)  | O51  | Y5   | O54  | 136.8                                                       |
| O24 <sup>2</sup> | Y1   | O23 <sup>2</sup> | 54.24(15)  | O51  | Y5   | O58  | 79.1                                                        |
| O31              | Y1   | O13 <sup>1</sup> | 132.24(16) | O52  | Y5   | O53  | 77.6                                                        |
| O31              | Y1   | O14 <sup>1</sup> | 79.40(16)  | O52  | Y5   | O57  | 148.9                                                       |
| O31              | Y1   | O23 <sup>2</sup> | 75.33(16)  | O52  | Y5   | O55  | 137.8                                                       |
| O31              | Y1   | O24 <sup>2</sup> | 89.83(18)  | O52  | Y5   | O54  | 66.6                                                        |
| O31              | Y1   | O32              | 80.78(17)  | O52  | Y5   | O58  | 73.9                                                        |
| O32              | Y1   | O13 <sup>1</sup> | 134.46(15) | O53  | Y5   | O57  | 119.4                                                       |
| O32              | Y1   | O14 <sup>1</sup> | 149.04(15) | O53  | Y5   | O55  | 74.5                                                        |
| O32              | Y1   | O23 <sup>2</sup> | 75.21(16)  | O53  | Y5   | O54  | 78.1                                                        |
| O32              | Y1   | O24 <sup>2</sup> | 129.24(16) | O53  | Y5   | O58  | 142.6                                                       |
| O1               | Ge1  | O11              | 174.04(16) | O57  | Y5   | O55  | 73.3                                                        |
| O2               | Ge1  | O1               | 86.18(16)  | O57  | Y5   | O54  | 138.7                                                       |
| O2               | Ge1  | O11              | 89.66(17)  | O57  | Y5   | O58  | 78.4                                                        |
| O12              | Ge1  | O1               | 89.94(19)  | O55  | Y5   | O54  | 77                                                          |
| O12              | Ge1  | O2               | 93.0(2)    | O55  | Y5   | O58  | 142.2                                                       |
| O12              | Ge1  | O11              | 86.01(17)  | O54  | Y5   | O58  | 111.2                                                       |
| O12              | Ge1  | O21              | 173.65(19) | ---- |      |      |                                                             |
| O12              | Ge1  | O22              | 90.54(19)  |      |      |      | <sup>1</sup> 1/2+x,1/2+y,+z; <sup>2</sup> 1/2+x,1/2-y,1/2+z |
| O21              | Ge1  | O1               | 96.0(2)    |      |      |      |                                                             |

Table S5. Selected bond lengths and angles for IMP-34-Dy

| Atom | Atom             | Length/Å | Atom | Atom | Length/Å                                                                               |
|------|------------------|----------|------|------|----------------------------------------------------------------------------------------|
| Dy1  | O3 <sup>1</sup>  | 2.322(5) | Ge1  | O21  | 1.876(5)                                                                               |
| Dy1  | O4               | 2.277(4) | Ge1  | O22  | 1.882(4)                                                                               |
| Dy1  | O13 <sup>2</sup> | 2.383(5) | Dy5  | O53  | 2.3628                                                                                 |
| Dy1  | O14 <sup>2</sup> | 2.474(5) | Dy5  | O51  | 2.3164                                                                                 |
| Dy1  | O23 <sup>3</sup> | 2.436(5) | Dy5  | O52  | 2.413                                                                                  |
| Dy1  | O24 <sup>3</sup> | 2.372(5) | Dy5  | O54  | 2.4919                                                                                 |
| Dy1  | O31              | 2.378(6) | Dy5  | O55  | 2.4291                                                                                 |
| Dy1  | O32              | 2.369(6) | Dy5  | O56  | 2.4705                                                                                 |
| Ge1  | O1               | 1.891(4) | Dy5  | O57  | 2.3778                                                                                 |
| Ge1  | O2               | 1.888(5) | ---- |      |                                                                                        |
| Ge1  | O11              | 1.896(4) |      |      | <sup>1</sup> 1-x,1-y,1-z; <sup>2</sup> 1/2-x,1/2-y,1-z; <sup>3</sup> 1/2-x,1/2+y,1/2-z |
| Ge1  | O12              | 1.877(5) |      |      |                                                                                        |

  

| Atom             | Atom | Atom             | Angle/°    | Atom | Atom | Atom             | Angle/°                                                                                 |
|------------------|------|------------------|------------|------|------|------------------|-----------------------------------------------------------------------------------------|
| O3 <sup>1</sup>  | Dy1  | O13 <sup>2</sup> | 82.29(19)  | O32  | Dy1  | O13 <sup>2</sup> | 134.91(18)                                                                              |
| O3 <sup>1</sup>  | Dy1  | O14 <sup>2</sup> | 73.5(2)    | O32  | Dy1  | O14 <sup>2</sup> | 148.12(19)                                                                              |
| O3 <sup>1</sup>  | Dy1  | O23 <sup>3</sup> | 143.14(19) | O32  | Dy1  | O23 <sup>3</sup> | 76.21(19)                                                                               |
| O3 <sup>1</sup>  | Dy1  | O24 <sup>3</sup> | 145.9(2)   | O32  | Dy1  | O24 <sup>3</sup> | 129.70(18)                                                                              |
| O3 <sup>1</sup>  | Dy1  | O31              | 74.8(2)    | O32  | Dy1  | O31              | 80.3(2)                                                                                 |
| O3 <sup>1</sup>  | Dy1  | O32              | 77.5(2)    | O1   | Ge1  | O11              | 173.75(19)                                                                              |
| O4               | Dy1  | O3 <sup>1</sup>  | 115.96(19) | O2   | Ge1  | O1               | 85.66(19)                                                                               |
| O4               | Dy1  | O13 <sup>2</sup> | 75.21(17)  | O2   | Ge1  | O11              | 89.9(2)                                                                                 |
| O4               | Dy1  | O14 <sup>2</sup> | 126.70(18) | O12  | Ge1  | O1               | 90.1(2)                                                                                 |
| O4               | Dy1  | O23 <sup>3</sup> | 83.20(18)  | O12  | Ge1  | O2               | 92.4(2)                                                                                 |
| O4               | Dy1  | O24 <sup>3</sup> | 92.3(2)    | O12  | Ge1  | O11              | 85.7(2)                                                                                 |
| O4               | Dy1  | O31              | 152.8(2)   | O12  | Ge1  | O22              | 91.3(2)                                                                                 |
| O4               | Dy1  | O32              | 78.19(18)  | O21  | Ge1  | O1               | 95.7(2)                                                                                 |
| O13 <sup>2</sup> | Dy1  | O14 <sup>2</sup> | 53.30(16)  | O21  | Ge1  | O2               | 90.0(2)                                                                                 |
| O13 <sup>2</sup> | Dy1  | O23 <sup>3</sup> | 134.39(17) | O21  | Ge1  | O11              | 88.6(2)                                                                                 |
| O23 <sup>3</sup> | Dy1  | O14 <sup>2</sup> | 121.74(18) | O21  | Ge1  | O12              | 173.9(2)                                                                                |
| O24 <sup>3</sup> | Dy1  | O13 <sup>2</sup> | 87.32(19)  | O21  | Ge1  | O22              | 86.9(2)                                                                                 |
| O24 <sup>3</sup> | Dy1  | O14 <sup>2</sup> | 74.26(18)  | O22  | Ge1  | O1               | 89.0(2)                                                                                 |
| O24 <sup>3</sup> | Dy1  | O23 <sup>3</sup> | 53.54(18)  | O22  | Ge1  | O2               | 173.5(2)                                                                                |
| O24 <sup>3</sup> | Dy1  | O31              | 88.8(2)    | O22  | Ge1  | O11              | 95.7(2)                                                                                 |
| O31              | Dy1  | O13 <sup>2</sup> | 132.01(19) | ---- |      |                  |                                                                                         |
| O31              | Dy1  | O14 <sup>2</sup> | 79.7(2)    |      |      |                  | <sup>1</sup> 1-x,1-y,1-z; <sup>2</sup> 1/2-x,1/2-y,1-z; <sup>3</sup> 1/2-x,1/2+y,1/2-z; |
| O31              | Dy1  | O23 <sup>3</sup> | 75.62(19)  |      |      |                  |                                                                                         |

## References

1. B. Spingler, S. Schnidrig, T. Todorova and F. Wild, *CrystEngComm*, 2012, **14**, 751-757.
2. O.V. Dolomanov, L.J. Bourhis, R.J. Gildea, J.A.K. Howard, H. Puschmann, *J. Appl. Cryst.*, 2009, **42**, 339-341.
3. SHELXTL v5.1, Bruker AXS, Madison, WI, 1998.
4. SHELX-2013, G.M. Sheldrick, *Acta Cryst.*, 2015, **C71**, 3-8.
5. A.L. Spek (2003, 2009) PLATON, A Multipurpose Crystallographic Tool, Utrecht University, Utrecht, The Netherlands. See also A.L. Spek, *Acta. Cryst.*, 2015, **C71**, 9-18.
